# Supplementary material
Source: PubMed Central journal article supplement (PMC5967388)

a)

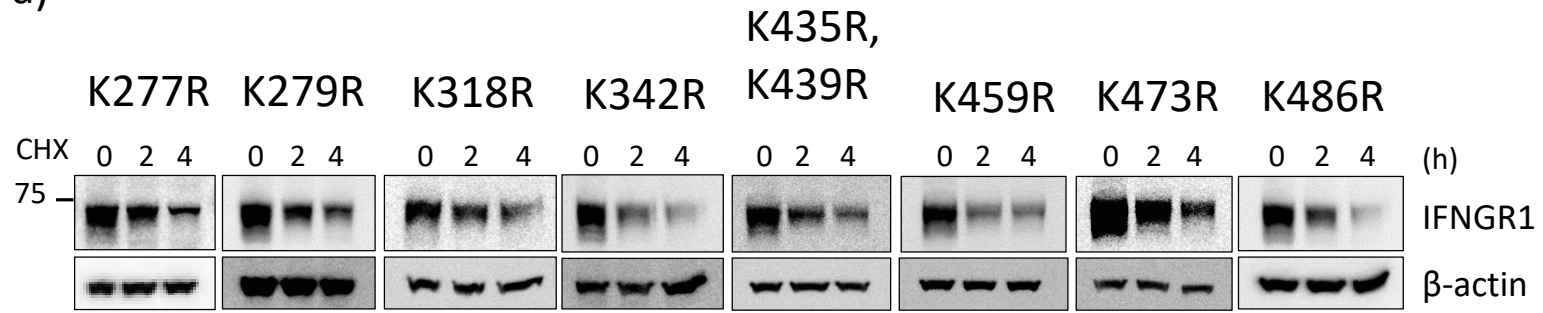

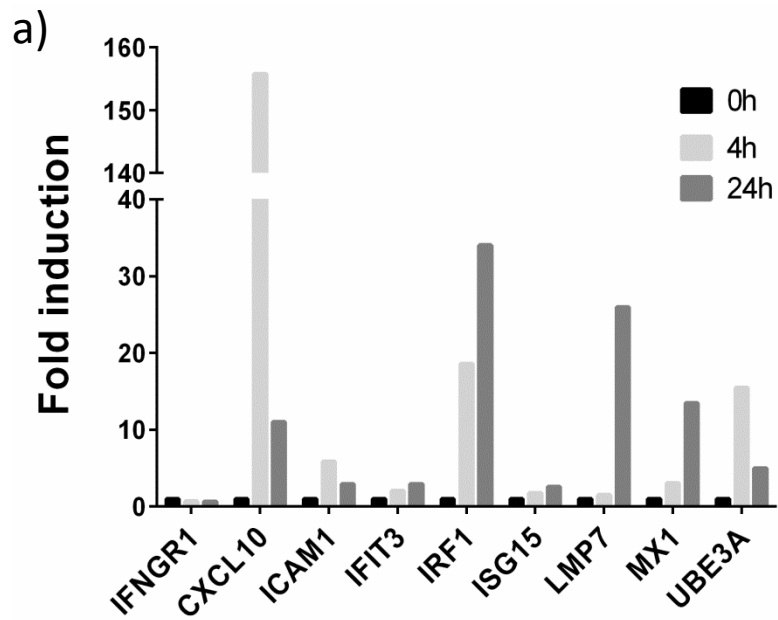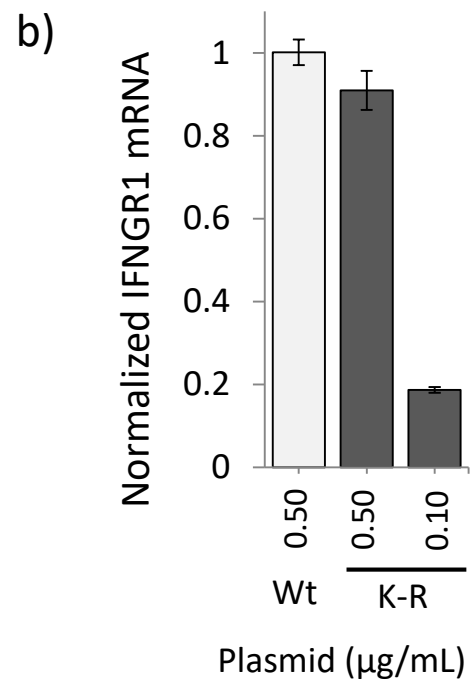

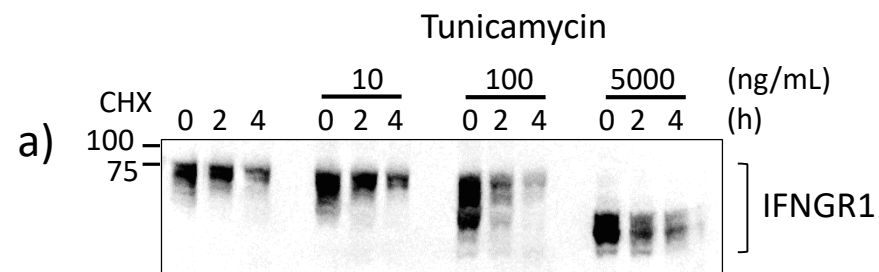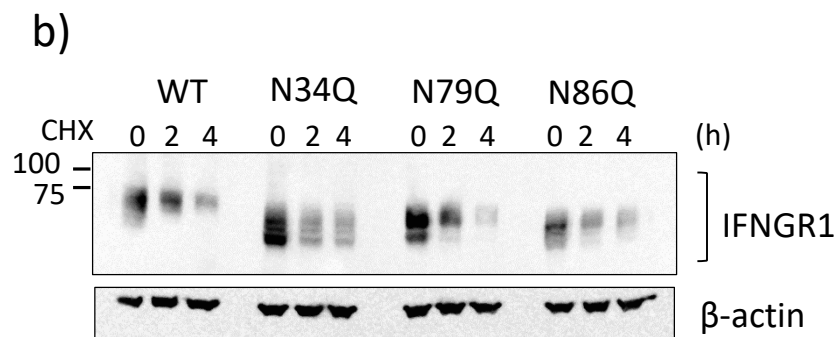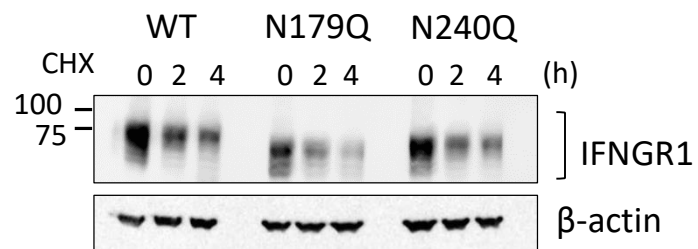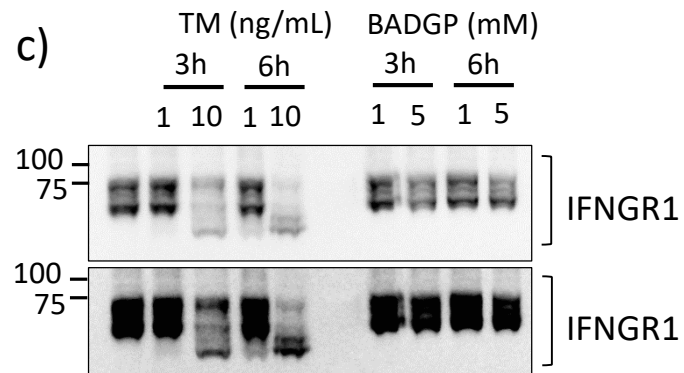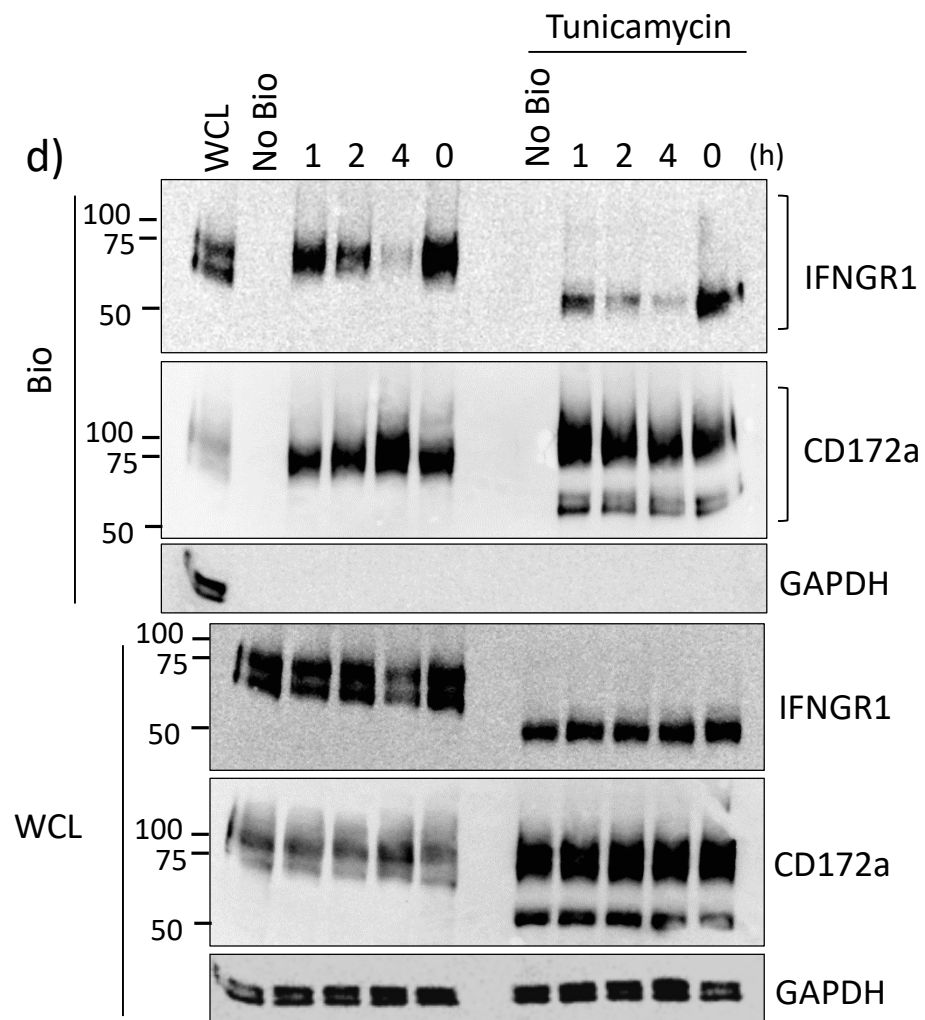

Supplement: NIHMS932060-supplement-supplemental_file.pdf [file NIHMS932060-supplement-supplemental_file.pdf]
